# Supplementary material for: Direct S-Poly(T) Plus assay in quantification of microRNAs without RNA extraction and its implications in colorectal cancer biomarker studies
Source: Springer Nature journal article supplement (doi:10.1186/s12967-019-2061-6), 2019-09-23
Supplement: MOESM1 [file 17199686]

**Additional file 1: Table S1.** Characteristics of patients and healthy controls enrolled in this study.

A. Plasma samples in study of miRNA biomarker selection collected from Shenzhen People’s Hospital (Shenzhen, China).

colorectal cancer

| number | age | gender | TNM |
|--------|-----|--------|-----|
| 1      | 57  | male   | I   |
| 2      | 33  | female | I   |
| 3      | 55  | male   | I   |
| 4      | 54  | male   | I   |
| 5      | 46  | male   | I   |
| 6      | 56  | female | I   |
| 7      | 58  | female | I   |
| 8      | 62  | female | I   |
| 9      | 79  | female | I   |
| 10     | 57  | male   | I   |
| 11     | 77  | male   | I   |
| 12     | 61  | female | I   |
| 13     | 49  | female | I   |
| 14     | 77  | female | I   |
| 15     | 61  | female | I   |
| 16     | 49  | female | I   |
| 17     | 63  | female | I   |
| 18     | 56  | female | I   |
| 19     | 52  | female | I   |
| 20     | 65  | male   | I   |
| 21     | 69  | female | I   |
| 22     | 63  | male   | I   |
| 23     | 68  | female | I   |
| 24     | 50  | female | I   |
| 25     | 52  | female | I   |
| 26     | 72  | male   | I   |
| 27     | 77  | male   | I   |
| 28     | 60  | male   | I   |
| 29     | 71  | female | I   |
| 30     | 60  | female | I   |
| 31     | 43  | female | I   |
| 32     | 76  | male   | I   |
| 33     | 65  | male   | I   |
| 34     | 79  | female | I   |
| 35     | 75  | female | I   |
| 36     | 60  | male   | I   |
| 37     | 57  | female | I   |
| 38     | 60  | male   | I   |
| 39     | 61  | male   | I   |
| 40     | 70  | male   | I   |
| 41     | 67  | female | I   |
| 42     | 57  | female | I   |
| 43     | 51  | female | I   |
| 44     | 73  | female | I A |

healthy

| number | gender | age |
|--------|--------|-----|
| 1      | male   | 57  |
| 2      | female | 36  |
| 3      | male   | 55  |
| 4      | male   | 54  |
| 5      | male   | 48  |
| 6      | female | 58  |
| 7      | female | 59  |
| 8      | female | 62  |
| 9      | female | 77  |
| 10     | male   | 44  |
| 11     | female | 81  |
| 12     | female | 55  |
| 13     | male   | 49  |
| 14     | female | 61  |
| 15     | female | 81  |
| 16     | female | 62  |
| 17     | female | 58  |
| 18     | female | 62  |
| 19     | male   | 64  |
| 20     | male   | 39  |
| 21     | male   | 57  |
| 22     | male   | 65  |
| 23     | male   | 54  |
| 24     | male   | 56  |
| 25     | male   | 81  |
| 26     | male   | 57  |
| 27     | female | 58  |
| 28     | female | 57  |
| 29     | female | 60  |
| 30     | male   | 73  |
| 31     | male   | 67  |
| 32     | female | 66  |
| 33     | female | 73  |
| 34     | female | 68  |
| 35     | male   | 58  |
| 36     | male   | 67  |
| 37     | female | 59  |
| 38     | male   | 55  |
| 39     | female | 66  |
| 40     | male   | 61  |
| 41     | female | 55  |
| 42     | female | 59  |
| 43     | female | 58  |
| 44     | female | 59  |

|    |    |        |      |
|----|----|--------|------|
| 45 | 38 | female | I A  |
| 46 | 57 | male   | I A  |
| 47 | 61 | female | I A  |
| 48 | 70 | male   | I A  |
| 49 | 76 | female | I A  |
| 50 | 56 | female | I A  |
| 51 | 40 | male   | I B  |
| 52 | 74 | female | I B  |
| 53 | 65 | male   | I B  |
| 54 | 41 | female | II   |
| 55 | 38 | female | II   |
| 56 | 81 | female | II   |
| 57 | 63 | female | II   |
| 58 | 58 | female | II   |
| 59 | 65 | male   | II   |
| 60 | 58 | female | II   |
| 61 | 58 | female | II   |
| 62 | 46 | male   | II A |
| 63 | 42 | male   | II A |
| 64 | 63 | male   | II A |
| 65 | 61 | female | II A |
| 66 | 56 | male   | II A |
| 67 | 57 | male   | II A |
| 68 | 88 | male   | II A |
| 69 | 59 | male   | II A |
| 70 | 77 | female | II A |
| 71 | 70 | male   | II A |
| 72 | 36 | female | II B |
| 73 | 32 | male   | II B |
| 74 | 38 | female | II B |
| 75 | 36 | female | II B |
| 76 | 55 | male   | II B |
| 77 | 53 | male   | II B |
| 78 | 40 | female | II B |
| 79 | 66 | male   | II B |
| 80 | 63 | male   | II B |
| 81 | 60 | male   | II B |
| 82 | 64 | female | II B |
| 83 | 56 | male   | II B |
| 84 | 68 | male   | II B |
| 85 | 66 | female | II B |
| 86 | 76 | male   | II B |
| 87 | 66 | male   | II B |
| 88 | 65 | male   | II B |
| 89 | 58 | female | II B |
| 90 | 80 | female | II C |
| 91 | 65 | female | II C |
| 92 | 82 | female | II C |
| 93 | 79 | female | II C |

|    |        |    |
|----|--------|----|
| 45 | female | 44 |
| 46 | male   | 63 |
| 47 | male   | 58 |
| 48 | male   | 60 |
| 49 | male   | 55 |
| 50 | male   | 54 |
| 51 | male   | 46 |
| 52 | female | 72 |
| 53 | female | 78 |
| 54 | female | 55 |
| 55 | female | 46 |
| 56 | female | 56 |
| 57 | female | 57 |
| 58 | male   | 56 |
| 59 | female | 56 |
| 60 | female | 56 |
| 61 | male   | 56 |
| 62 | male   | 49 |
| 63 | male   | 46 |
| 64 | male   | 64 |
| 65 | female | 62 |
| 66 | female | 56 |
| 67 | male   | 54 |
| 68 | female | 55 |
| 69 | female | 58 |
| 70 | male   | 61 |
| 71 | male   | 64 |
| 72 | female | 37 |
| 73 | male   | 37 |
| 74 | female | 46 |
| 75 | female | 37 |
| 76 | male   | 55 |
| 77 | male   | 53 |
| 78 | female | 48 |
| 79 | male   | 59 |
| 80 | male   | 55 |
| 81 | female | 69 |
| 82 | male   | 55 |
| 83 | male   | 56 |
| 84 | male   | 54 |
| 85 | male   | 78 |
| 86 | male   | 71 |
| 87 | female | 75 |
| 88 | male   | 59 |
| 89 | male   | 67 |
| 90 | female | 61 |
| 91 | female | 70 |
| 92 | female | 70 |
| 93 | female | 83 |

|     |    |        |      |
|-----|----|--------|------|
| 94  | 58 | female | IIIA |
| 95  | 37 | male   | IIIA |
| 96  | 33 | male   | IIIA |
| 97  | 53 | male   | IIIA |
| 98  | 78 | female | IIIA |
| 99  | 54 | male   | IIIA |
| 100 | 69 | male   | IIIA |
| 101 | 81 | male   | IIIA |
| 102 | 73 | male   | IIIA |
| 103 | 66 | male   | IIIA |
| 104 | 50 | female | IIIA |
| 105 | 66 | male   | IIIA |
| 106 | 62 | male   | IIIA |
| 107 | 70 | male   | IIIA |
| 108 | 62 | male   | IIIA |
| 109 | 37 | female | IIIB |
| 110 | 74 | female | IIIB |
| 111 | 32 | male   | IIIB |
| 112 | 63 | male   | IIIB |
| 113 | 65 | male   | IIIB |
| 114 | 85 | female | IIIB |
| 115 | 66 | female | IIIB |
| 116 | 66 | male   | IIIB |
| 117 | 56 | female | IIIB |
| 118 | 63 | male   | IIIB |
| 119 | 45 | female | IIIB |
| 120 | 57 | male   | IIIB |
| 121 | 62 | male   | IIIB |
| 122 | 49 | female | IIIB |
| 123 | 33 | male   | IIIC |
| 124 | 37 | female | IIIC |
| 125 | 27 | male   | IIIC |
| 126 | 43 | male   | IIIC |
| 127 | 54 | male   | IIIC |
| 128 | 45 | male   | IIIC |
| 129 | 35 | male   | IIIC |
| 130 | 65 | female | IIIC |
| 131 | 72 | male   | IIIC |
| 132 | 65 | female | IIIC |
| 133 | 60 | female | IIIC |
| 134 | 50 | female | IIIC |
| 135 | 57 | male   | IIIC |
| 136 | 57 | female | IIIC |
| 137 | 36 | female | IV   |
| 138 | 45 | male   | IV   |
| 139 | 60 | female | IV   |
| 140 | 47 | male   | IV   |
| 141 | 49 | female | IV   |

|     |        |    |
|-----|--------|----|
| 94  | female | 60 |
| 95  | male   | 46 |
| 96  | male   | 42 |
| 97  | male   | 53 |
| 98  | female | 55 |
| 99  | female | 47 |
| 100 | female | 60 |
| 101 | female | 66 |
| 102 | female | 82 |
| 103 | male   | 79 |
| 104 | male   | 61 |
| 105 | female | 73 |
| 106 | male   | 57 |
| 107 | female | 57 |
| 108 | male   | 53 |
| 109 | female | 43 |
| 110 | female | 72 |
| 111 | male   | 44 |
| 112 | female | 66 |
| 113 | female | 63 |
| 114 | female | 65 |
| 115 | female | 60 |
| 116 | male   | 58 |
| 117 | male   | 60 |
| 118 | male   | 57 |
| 119 | female | 58 |
| 120 | female | 55 |
| 121 | male   | 62 |
| 122 | male   | 52 |
| 123 | male   | 43 |
| 124 | female | 43 |
| 125 | male   | 34 |
| 126 | male   | 47 |
| 127 | male   | 54 |
| 128 | male   | 47 |
| 129 | male   | 83 |
| 130 | male   | 60 |
| 131 | male   | 54 |
| 132 | female | 60 |
| 133 | female | 60 |
| 134 | male   | 62 |
| 135 | male   | 55 |
| 136 | male   | 54 |
| 137 | female | 42 |
| 138 | male   | 48 |
| 139 | female | 61 |
| 140 | female | 75 |
| 141 | female | 76 |

|     |    |        |      |
|-----|----|--------|------|
| 142 | 35 | male   | IV   |
| 143 | 38 | female | IV   |
| 144 | 68 | male   | IV   |
| 145 | 77 | male   | IV   |
| 146 | 60 | female | IV   |
| 147 | 57 | female | IV A |
| 148 | 30 | male   | IV A |
| 149 | 66 | male   | IV A |
| 150 | 63 | male   | IV A |
| 151 | 58 | female | IV A |
| 152 | 54 | male   | IV A |
| 153 | 57 | female | IV A |
| 154 | 53 | female | IV A |
| 155 | 65 | female | IV A |
| 156 | 65 | male   | IV A |
| 157 | 64 | female | IV A |
| 158 | 68 | male   | IV A |
| 159 | 72 | female | IV A |
| 160 | 60 | male   | IV A |
| 161 | 59 | male   | IV A |
| 162 | 45 | female | IV A |
| 163 | 32 | female | IV B |
| 164 | 63 | male   | IV B |
| 165 | 52 | male   | IV B |
| 166 | 72 | female | IV B |
| 167 | 55 | male   | IV B |
| 168 | 55 | male   | IV B |
| 169 | 64 | male   | IV B |
| 170 | 60 | female | IV B |
| 171 | 63 | male   | IV B |
| 172 | 57 | male   | IV B |

|     |        |    |
|-----|--------|----|
| 142 | male   | 54 |
| 143 | male   | 59 |
| 144 | female | 67 |
| 145 | male   | 65 |
| 146 | male   | 54 |
| 147 | female | 59 |
| 148 | male   | 35 |
| 149 | male   | 57 |
| 150 | male   | 58 |
| 151 | female | 64 |
| 152 | female | 56 |
| 153 | male   | 62 |
| 154 | female | 61 |
| 155 | female | 66 |
| 156 | female | 79 |
| 157 | male   | 56 |
| 158 | male   | 65 |
| 159 | male   | 59 |
| 160 | female | 58 |
| 161 | male   | 62 |
| 162 | female | 55 |
| 163 | female | 27 |
| 164 | male   | 65 |
| 165 | male   | 52 |
| 166 | female | 69 |
| 167 | male   | 59 |
| 168 | female | 63 |
| 169 | male   | 83 |
| 170 | female | 56 |
| 171 | female | 59 |
| 172 | male   | 57 |

B. Serum samples in study of miRNA biomarker confirmation collected from Cancer Center of Guangzhou Medical University (Guangzhou, China).

patients with colorectal cancer

| number | age | gender | TNM  |
|--------|-----|--------|------|
| 1      | 42  | female | I    |
| 2      | 63  | female | I    |
| 3      | 55  | male   | I    |
| 4      | 43  | male   | I    |
| 5      | 51  | male   | I    |
| 6      | 72  | female | I    |
| 7      | 30  | female | II   |
| 8      | 26  | female | II   |
| 9      | 58  | female | II A |
| 10     | 67  | female | II A |
| 11     | 35  | female | II A |

patients from Rectum Department but without colorectal cancer

| number | age | gender |
|--------|-----|--------|
| 1      | 46  | female |
| 2      | 49  | female |
| 3      | 47  | male   |
| 4      | 37  | male   |
| 5      | 53  | female |
| 6      | 39  | male   |
| 7      | 34  | female |
| 8      | 39  | female |
| 9      | 51  | female |
| 10     | 39  | female |
| 11     | 54  | female |

|    |    |        |       |
|----|----|--------|-------|
| 12 | 57 | male   | II A  |
| 13 | 52 | male   | II A  |
| 14 | 43 | female | II B  |
| 15 | 61 | male   | II B  |
| 16 | 71 | female | II B  |
| 17 | 67 | male   | II B  |
| 18 | 39 | female | II B  |
| 19 | 44 | male   | II B  |
| 20 | 47 | male   | II B  |
| 21 | 38 | female | II C  |
| 22 | 50 | male   | III B |
| 23 | 60 | female | III B |
| 24 | 56 | male   | III B |
| 25 | 51 | female | III B |
| 26 | 42 | male   | III C |
| 27 | 45 | male   | III C |
| 28 | 53 | male   | III C |
| 29 | 69 | female | III C |
| 30 | 60 | male   | III C |
| 31 | 61 | male   | III C |
| 32 | 62 | male   | III C |
| 33 | 57 | female | IV    |
| 34 | 57 | male   | IV    |
| 35 | 63 | male   | IV    |
| 36 | 56 | female | IV B  |

|    |    |        |
|----|----|--------|
| 12 | 54 | female |
| 13 | 41 | female |
| 14 | 44 | female |
| 15 | 53 | female |
| 16 | 37 | male   |
| 17 | 38 | male   |
| 18 | 35 | female |
| 19 | 33 | female |
| 20 | 36 | male   |
| 21 | 36 | male   |
| 22 | 34 | male   |
| 23 | 44 | female |
| 24 | 44 | female |
| 25 | 44 | female |
| 26 | 45 | female |
| 27 | 46 | male   |
| 28 | 44 | male   |
| 29 | 45 | male   |
| 30 | 41 | male   |
| 31 | 48 | female |
| 32 | 46 | female |
| 33 | 49 | female |
| 34 | 34 | female |
| 35 | 57 | male   |
| 36 | 50 | male   |

C. Samples in test of plasma vs. serum collected from Shenzhen People's Hospital (Shenzhen, China).  
healthy

| number | gender | age |
|--------|--------|-----|
| 1      | male   | 46  |
| 2      | male   | 42  |
| 3      | female | 40  |
| 4      | female | 43  |
| 5      | female | 28  |
| 6      | male   | 46  |
| 7      | female | 53  |
| 8      | female | 46  |
| 9      | male   | 57  |
| 10     | female | 52  |
