# Supplementary material for: Direct S-Poly(T) Plus assay in quantification of microRNAs without RNA extraction and its implications in colorectal cancer biomarker studies
Source: Springer Nature journal article supplement (doi:10.1186/s12967-019-2061-6), 2019-09-23

**Additional file 2: Figure S1.** Expression levels of has-miR-451a, has-miR-150-5p, has-miR-27b-3p and has-miR-92a-3p using purified RNA as template with the S-Poly(T) Plus method . Each volume of plasma and corresponding serum were from a same healthy donor. miRNA levels were normalized to spiked-in cel-miR-54-5p. Data are shown as means  $\pm$  SE, \*\*\* $P$ <0.001.

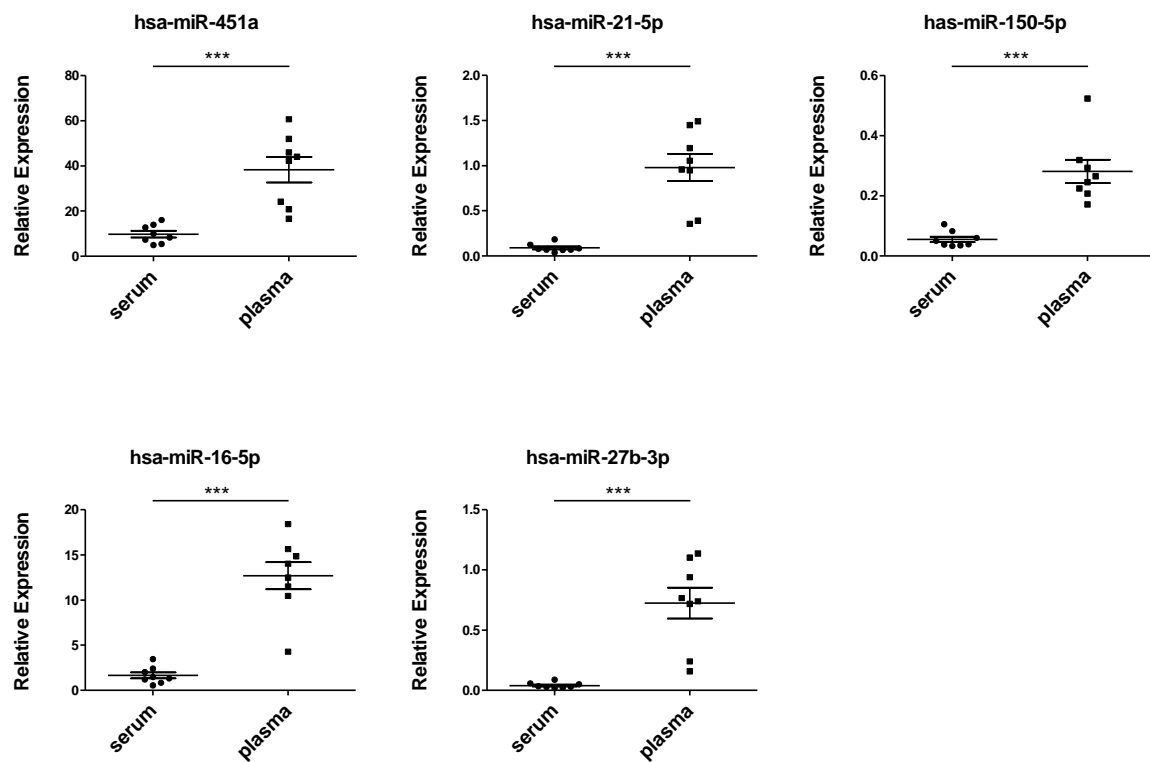

Supplement: MOESM2 [file 17199686]
