# Supplementary material for: Direct S-Poly(T) Plus assay in quantification of microRNAs without RNA extraction and its implications in colorectal cancer biomarker studies
Source: Springer Nature journal article supplement (doi:10.1186/s12967-019-2061-6), 2019-09-23

**Additional file 3: Figure S2.** Comparison of four kinds of DNA polymerase in the Direct S-Poly(T) Plus assay. Plasma was used as template. Alpha taq, Superm taq and Omni taq were purchased from VitaNavi company (VitaNavi, St. Louis USA) and HSSM taq were purchased from Geneup company (Geneup, Shenzhen, China).

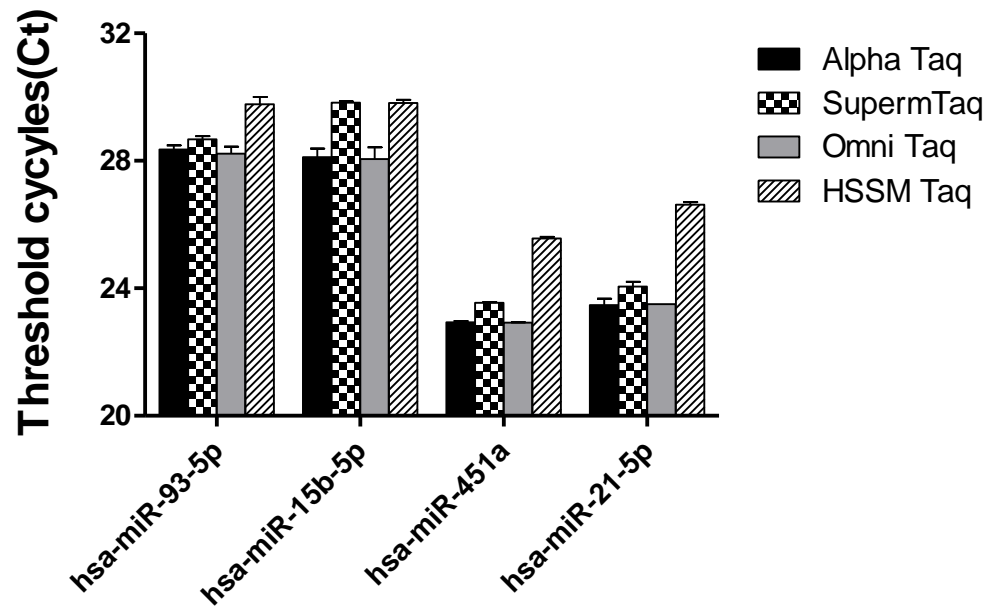

Supplement: MOESM3 [file 17199686]
