# Supplementary material for: Direct S-Poly(T) Plus assay in quantification of microRNAs without RNA extraction and its implications in colorectal cancer biomarker studies
Source: Springer Nature journal article supplement (doi:10.1186/s12967-019-2061-6), 2019-09-23

**Additional file 4: Figure S3.** Expression pattern of 104 miRNAs. Heatmap depicted miRNAs differentially expressed between healthy (NC) and colorectal cancer (CRC) pooled samples. miRNAs were detected with Direct S-Poly(T) Plus method.

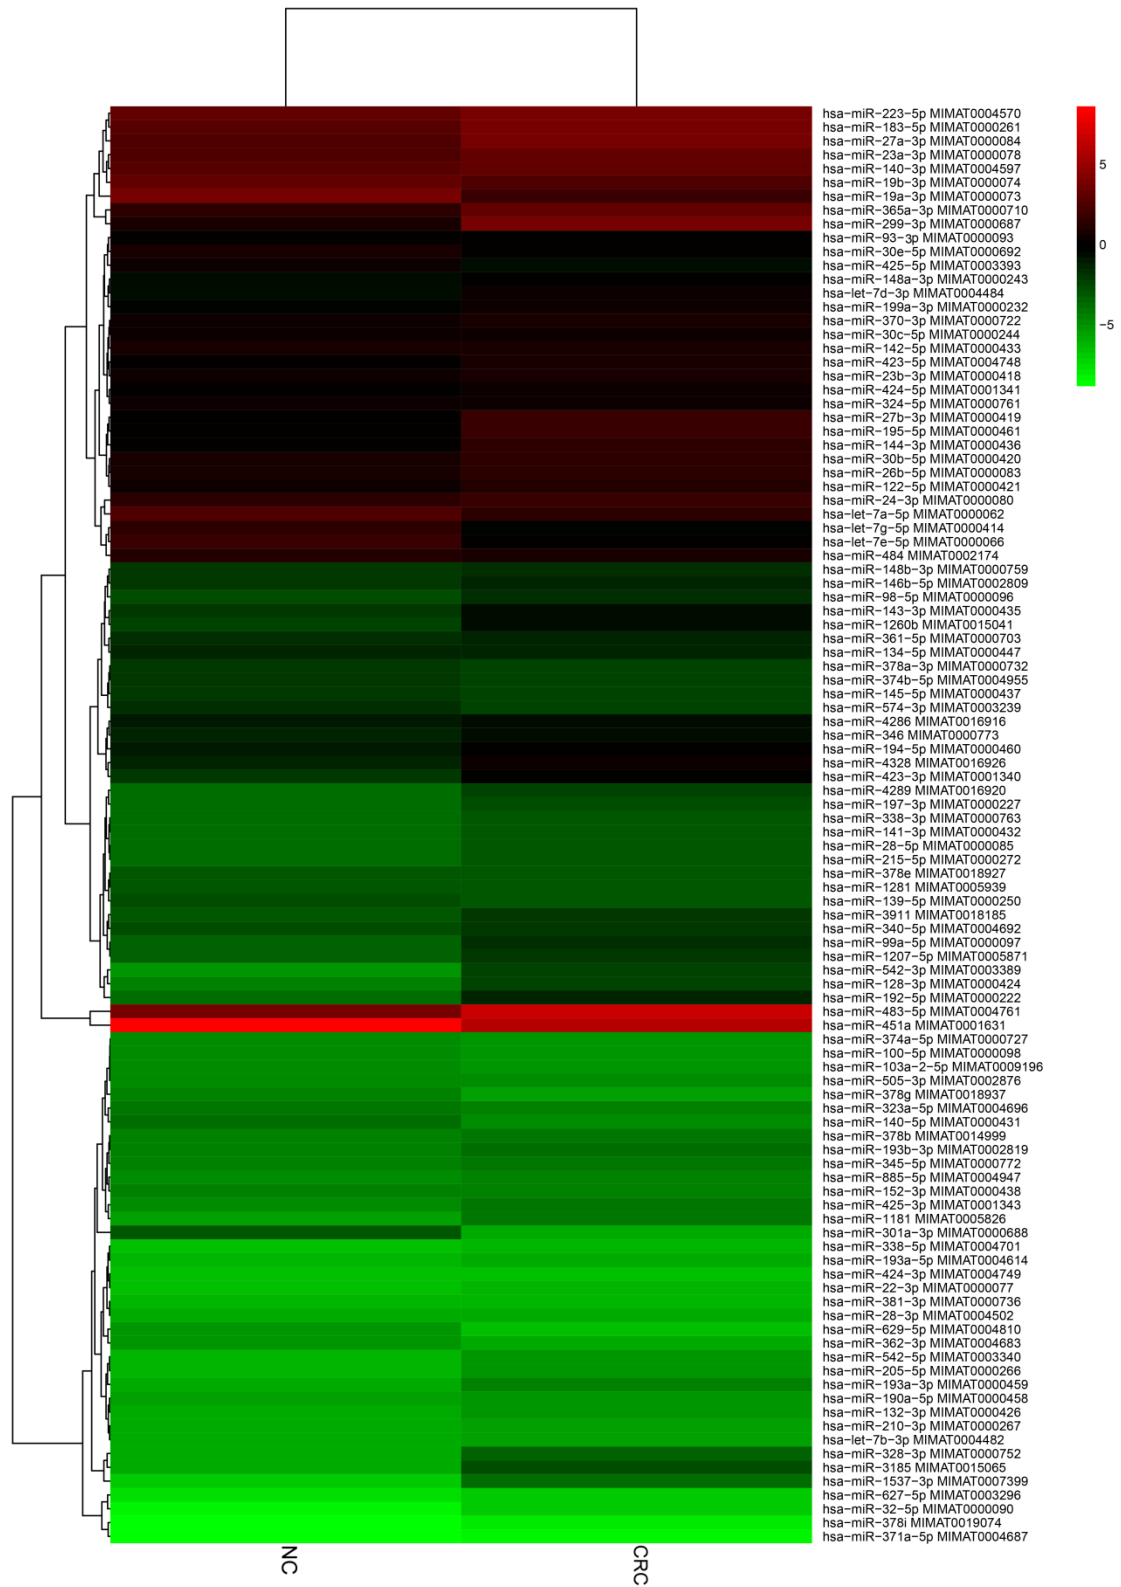

Supplement: MOESM4 [file 17199686]
