# Supplementary material for: Direct S-Poly(T) Plus assay in quantification of microRNAs without RNA extraction and its implications in colorectal cancer biomarker studies
Source: Springer Nature journal article supplement (doi:10.1186/s12967-019-2061-6), 2019-09-23

**Additional file 5: Figure S4.** Differentially expressed miRNAs in 38 plasma samples of colorectal cancer patients and 38 healthy individuals with the Direct S-Poly(T) Plus. Data are shown as means  $\pm$  SE, \* $p < 0.05$ , \*\*\* $p < 0.001$ , ns, not significant.

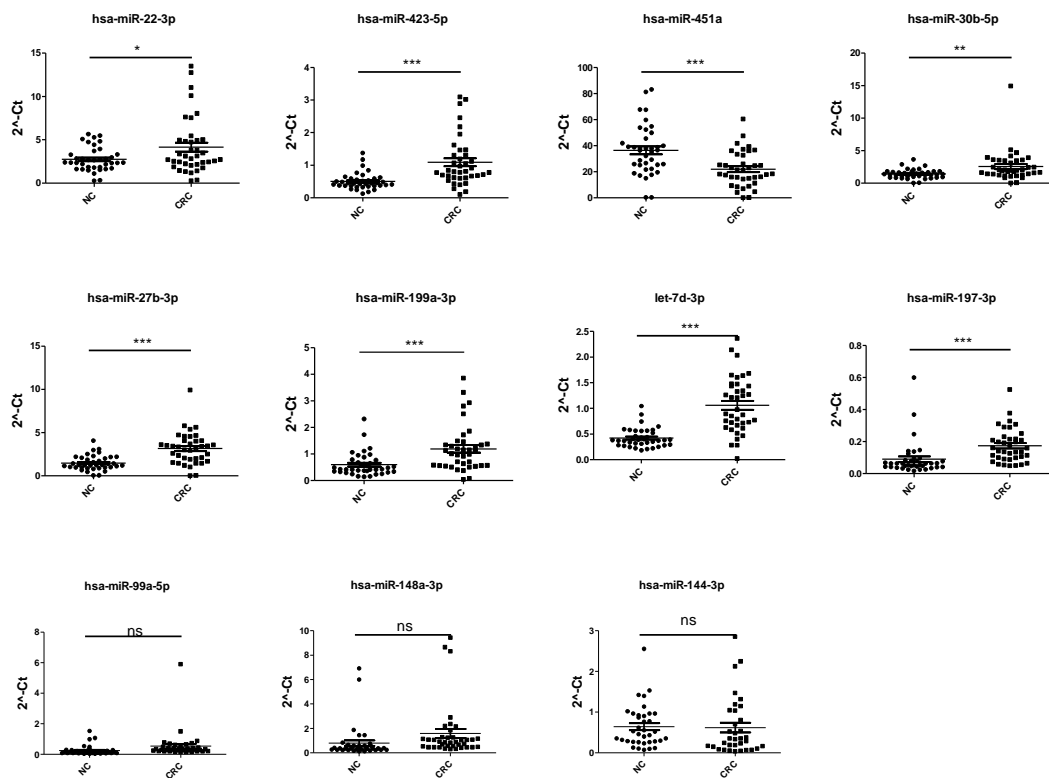

Supplement: MOESM5 [file 17199686]
