# Supplementary material for: Direct S-Poly(T) Plus assay in quantification of microRNAs without RNA extraction and its implications in colorectal cancer biomarker studies
Source: Springer Nature journal article supplement (doi:10.1186/s12967-019-2061-6), 2019-09-23

**Additional file 6: Figure S5.** The sequencing information of 7 potential miRNA biomarkers and reference miRNA. A. Alignment of mature miRNAs and sequencing results; B. Sanger sequencing peak and quality; C. Schematic diagram of cloning RT-qPCR products to plasmid vectors.

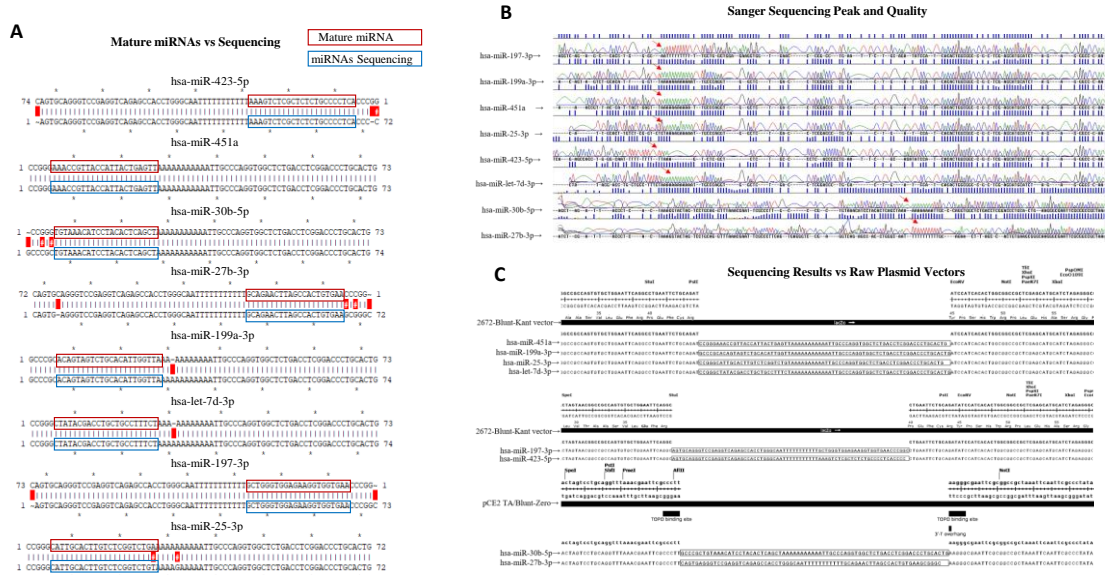

Supplement: MOESM6 [file 17199686]
