# Supplementary material for: Direct S-Poly(T) Plus assay in quantification of microRNAs without RNA extraction and its implications in colorectal cancer biomarker studies
Source: Springer Nature journal article supplement (doi:10.1186/s12967-019-2061-6), 2019-09-23

**Additional file 7: Figure S6.** Differentially expressed miRNAs in 36 serum samples of colorectal cancer patients and 36 controls with the Direct S-Poly(T) Plus. Serum samples were collected from Cancer Center of Guangzhou Medical University (Guangzhou). Data are shown as means  $\pm$  SE, \*\* $p < 0.01$ , \*\*\* $p < 0.001$ , ns, not significant.

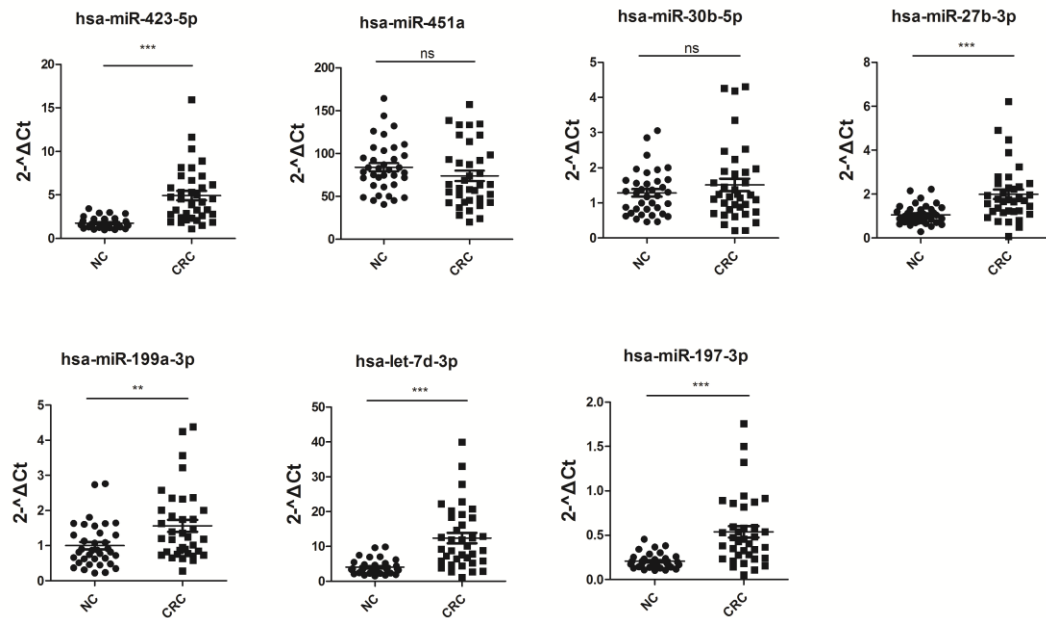

Supplement: MOESM7 [file 17199686]
